# Supplementary material
Source: PubMed Central journal article supplement (PMC2857109)

FIGURE. S1

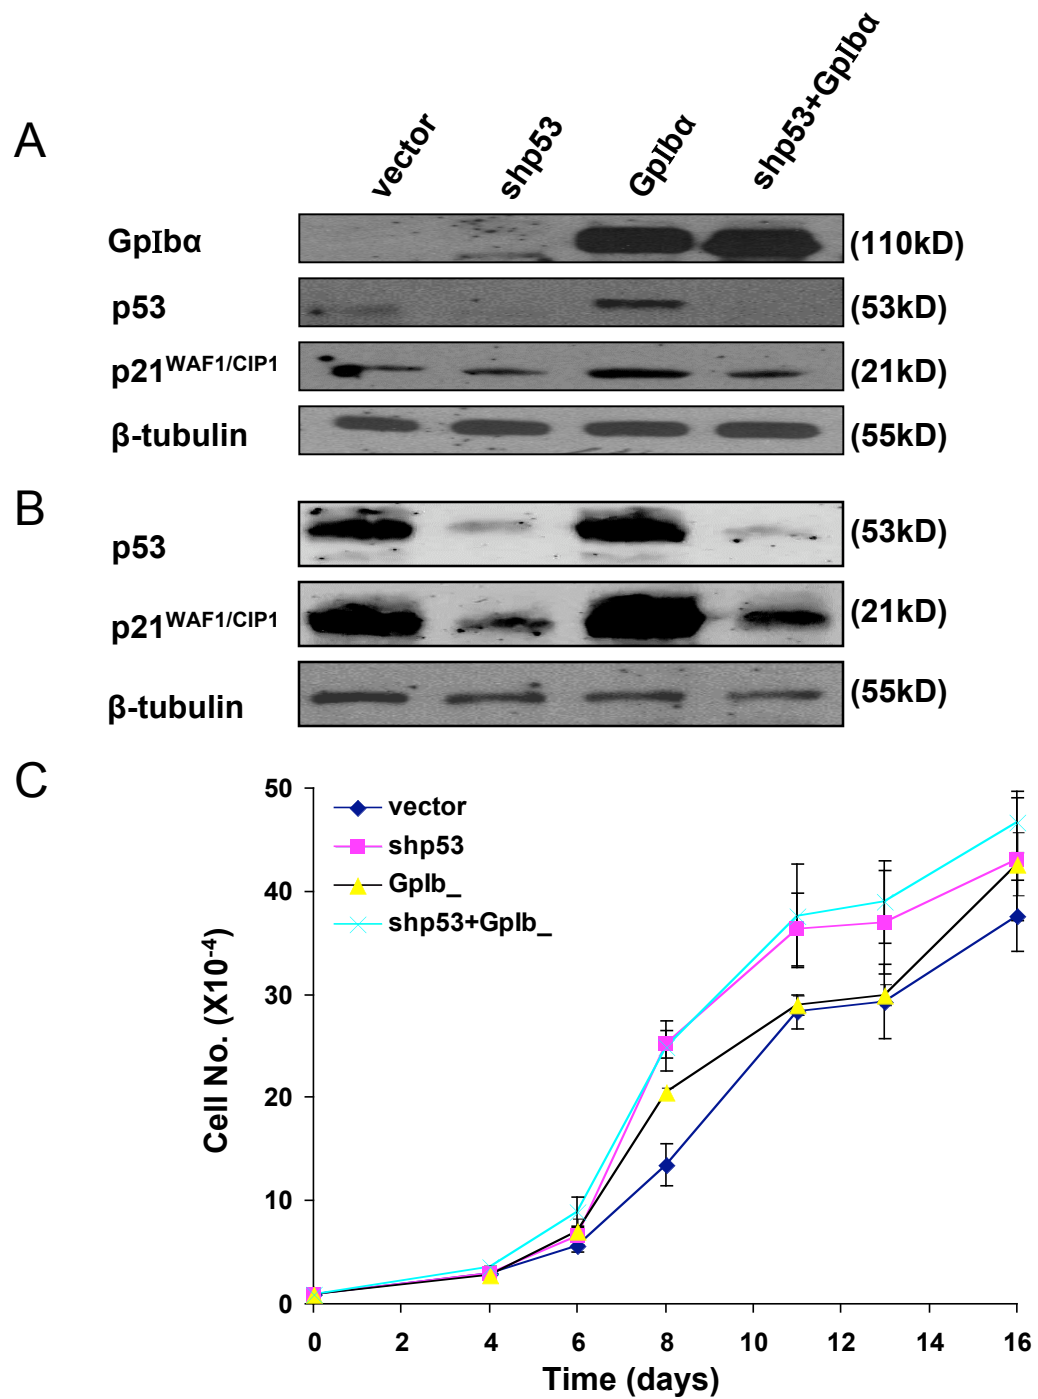

**FIGURE. S2**

| Name of Target         | Fold change in response to Gplba overexpression | shp53 | shp53+Gplba |
|------------------------|-------------------------------------------------|-------|-------------|
| Aurora B               | - 2.57                                          |       |             |
| Aurora A               | 4.28                                            |       |             |
| cdc25B                 | 5.45                                            |       |             |
| Chk2                   | 1.54                                            |       |             |
| c-Jun                  | 3.41                                            |       |             |
| c-Jun S73              | 1.7                                             |       |             |
| MEK6(MAP2K6)           | -1.82                                           |       |             |
| Paxillin               | 2.06                                            |       |             |
| Paxillin Y118          | -1.6                                            |       |             |
| LIMK1                  | 4.04                                            |       |             |
| p44MAPK/ERK1           | -3.10                                           |       |             |
| p44MAPK/ERK1 T202+Y204 | -1.50                                           |       |             |
| p42MAPK/ERK2           | No change                                       |       |             |
| p42MAPK/ERK2 T185+Y187 | -2.8                                            |       |             |
| p38aMAPK T180+Y182     | -3.03                                           |       |             |
| MEK1(MAP2K1)           | 2.31                                            |       |             |
| MEK1(MAP2K1) S297      | -1.35                                           |       |             |
| MEK1(MAP2K1) T385      | 1.16                                            |       |             |

**FIGURE. S3**

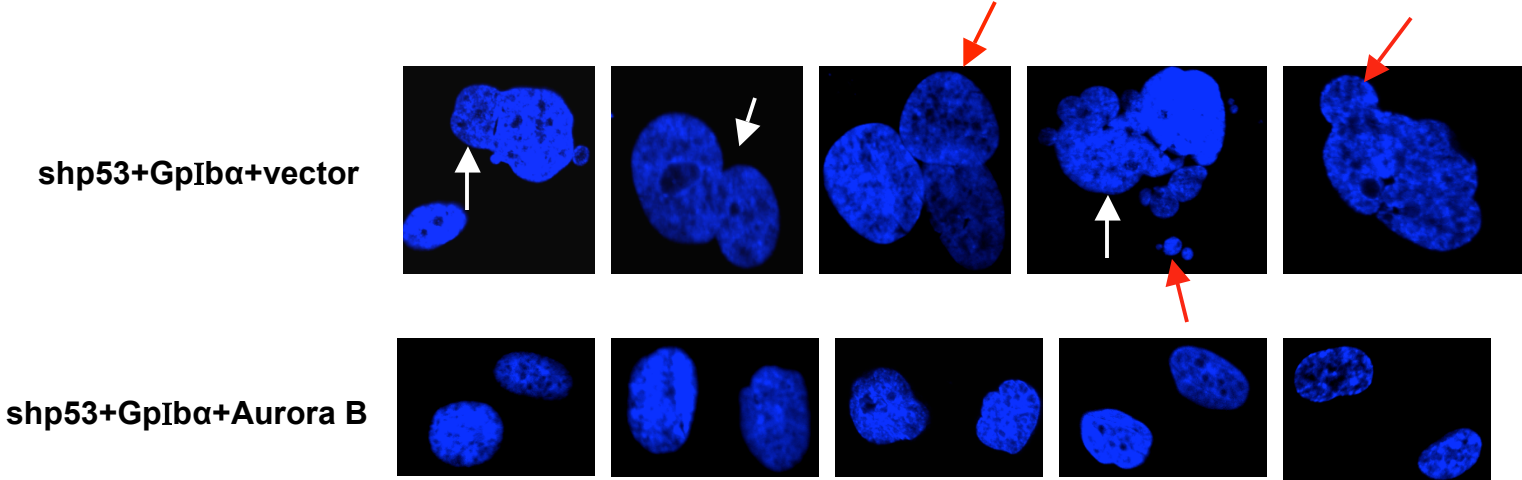

FIGURE. S4

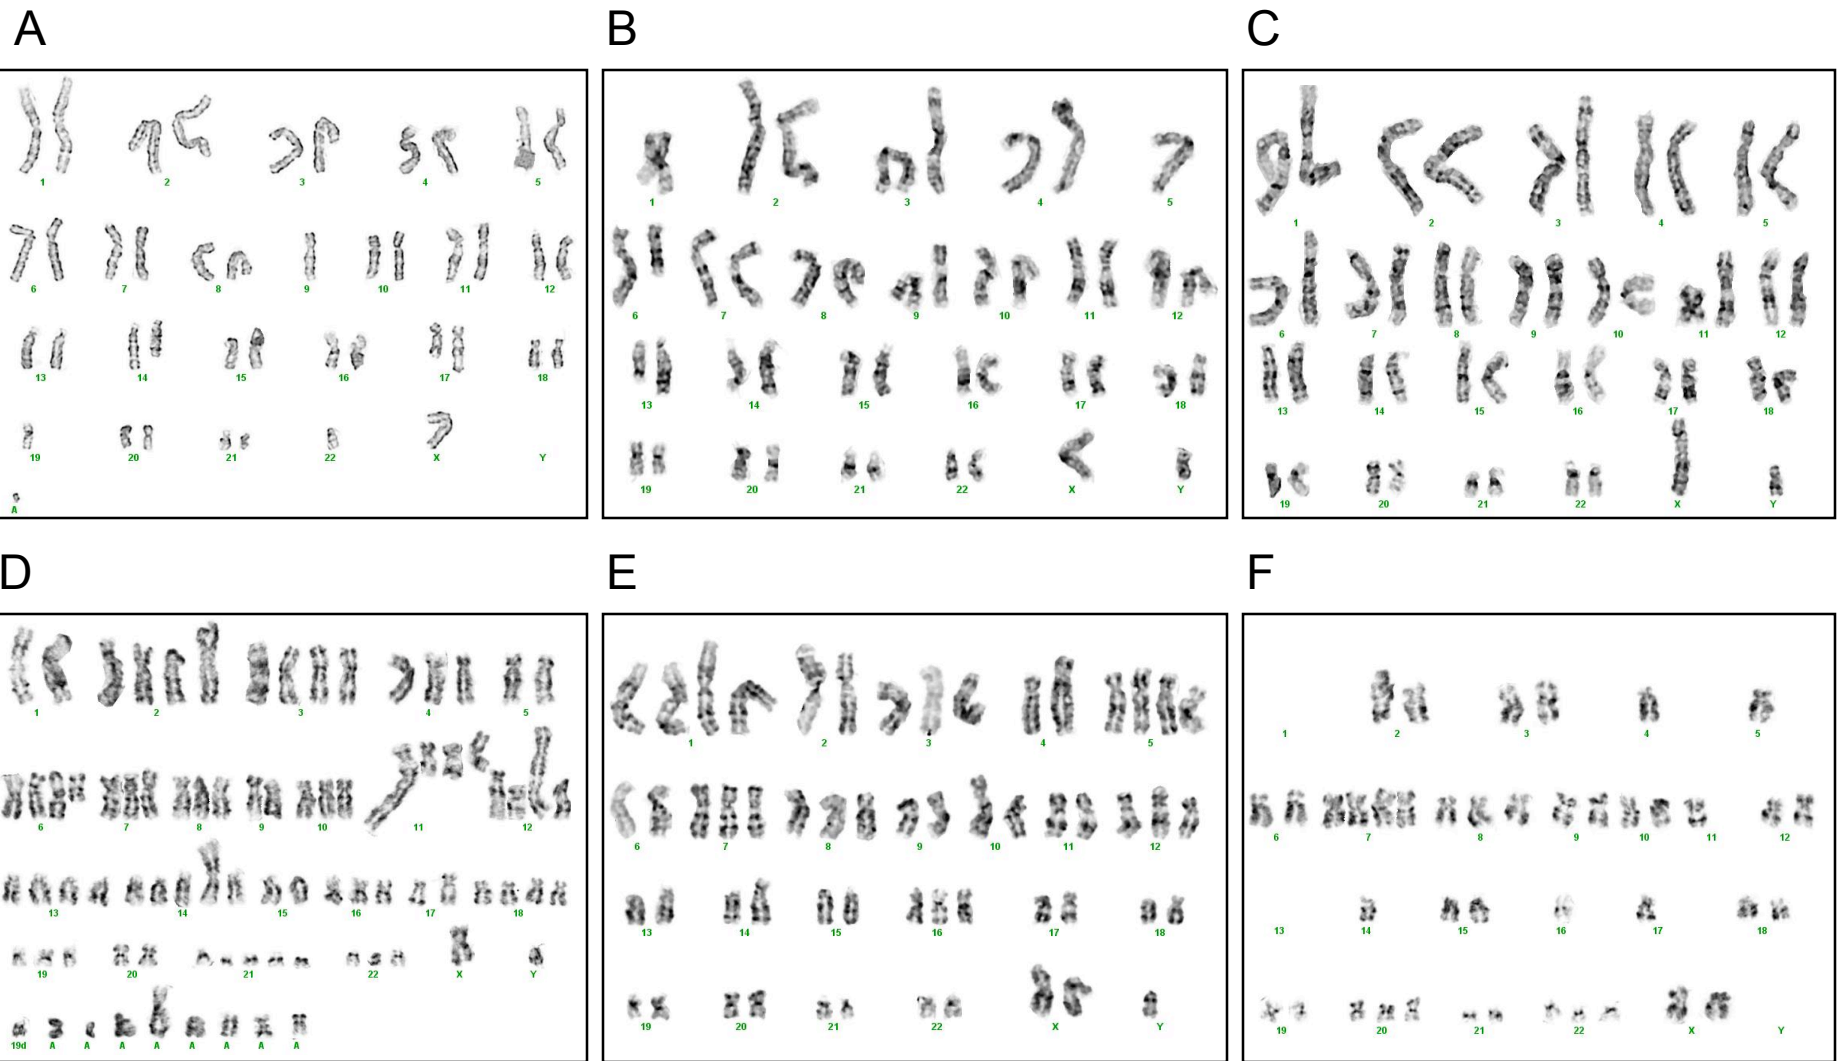

FIGURE.S5

shp53+GpIba

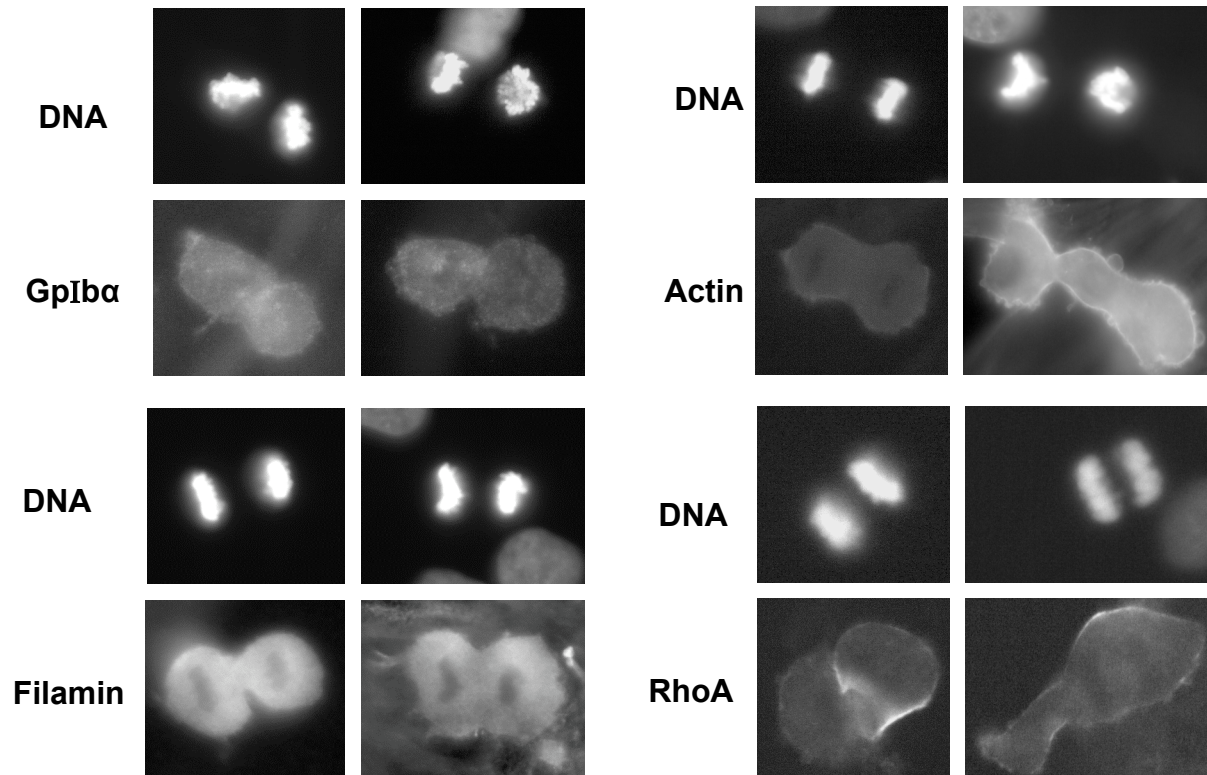

**FIGURE. S5**

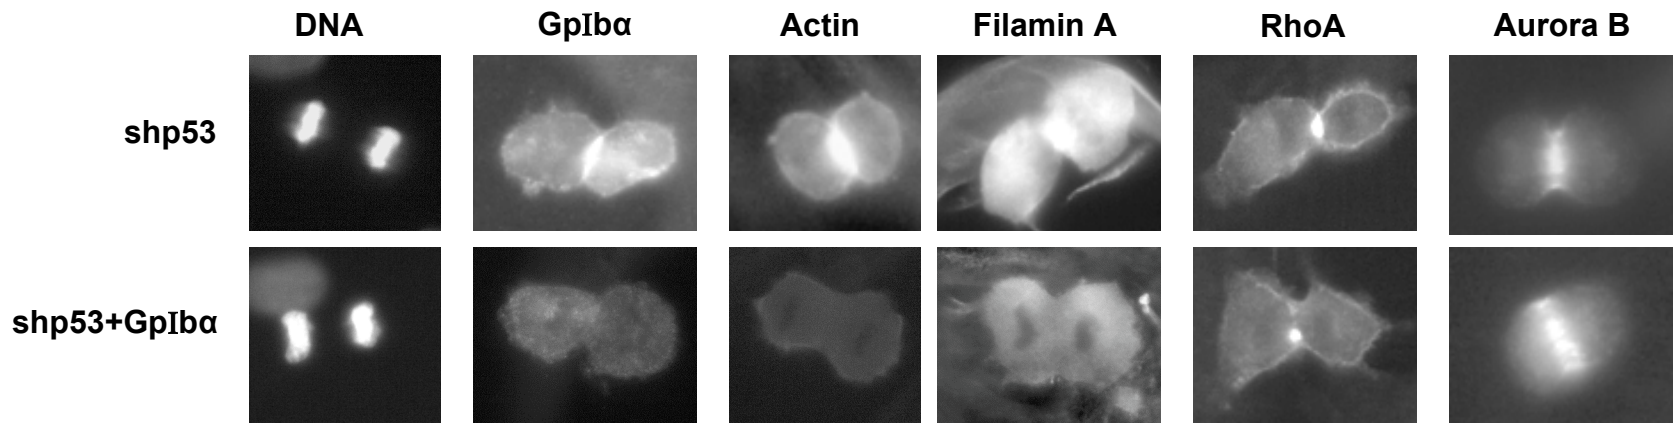

Supplement: supp_M109.084913_SUPPLEMENTAL_FIGS.ppt.pdf [file supp_M109.084913_SUPPLEMENTAL_FIGS.ppt.pdf]
